# Supplementary material for: Cyclo-(Phe-Tyr) reduces cerebral ischemia/reperfusion-induced blood–brain barrier dysfunction through regulation of autophagy
Source: Royal Society of Chemistry journal article supplement (doi:10.1039/d2fo02367a), 2022-01-01

## Supplementary Material 1

A

| OD1   | OD2   | OD     | EB ( $\mu\text{g/ml}$ ) |
|-------|-------|--------|-------------------------|
| 0.216 | 0.214 | 0.215  | 10.4                    |
| 0.130 | 0.130 | 0.13   | 5.2                     |
| 0.088 | 0.086 | 0.087  | 2.6                     |
| 0.066 | 0.065 | 0.0655 | 1.3                     |
| 0.058 | 0.062 | 0.06   | 0.65                    |
| 0.05  | 0.049 | 0.0495 | 0.325                   |
| 0.047 | 0.048 | 0.0475 | 0.1625                  |
| 0.045 | 0.046 | 0.0455 | 0                       |

B

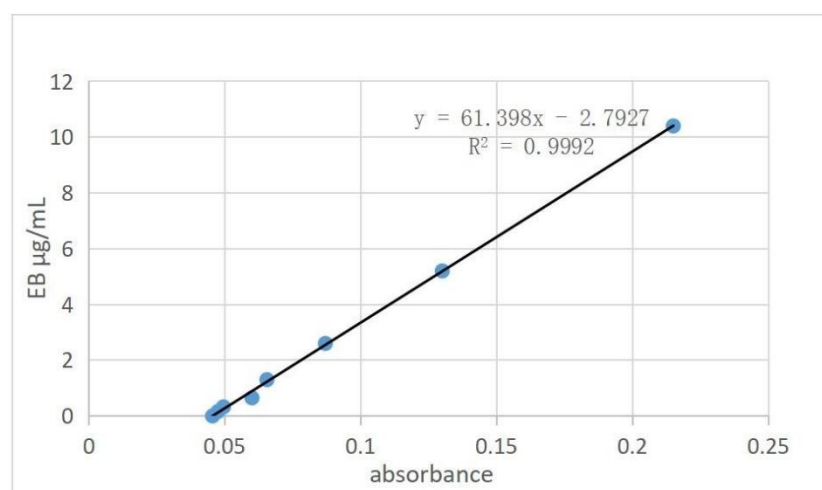

Supplementary Material 1

A.Determination results of standard curve of Evans blue

B.standard curve of Evans blue,  $R^2=0.992$

## Supplementary Material 2-RNA-seq and KEGG analysis

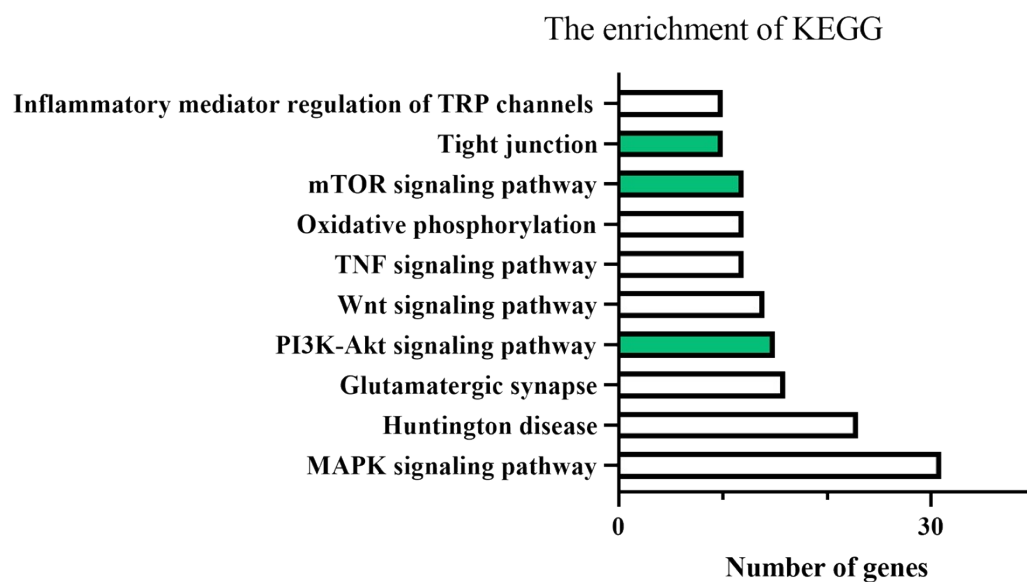

### Supplementary Material 3-antibody information

| Antibodies | Source species | Identifier | dilution | Company                                     |
|------------|----------------|------------|----------|---------------------------------------------|
| AKT        | Mouse          | 10176-2-AP | 1:1500   | PROTEINTECH GROUP<br>( Rosemont, IL , USA ) |
| PI3K P85   | Mouse          | 60225-1-Ig | 1:1500   | PROTEINTECH GROUP<br>( Rosemont, IL , USA ) |
| P-AKT      | Rabbit         | 66444-1-Ig | 1:1500   | PROTEINTECH GROUP<br>( Rosemont, IL , USA ) |
| mTOR       | Mouse          | 66888-1-Ig | 1:1500   | PROTEINTECH GROUP<br>( Rosemont, IL , USA ) |
| ATG5       | Mouse          | 66744-1-Ig | 1:1500   | PROTEINTECH GROUP<br>( Rosemont, IL , USA ) |
| LC3B       | Rabbit         | 14600-1-AP | 1:1500   | PROTEINTECH GROUP<br>( Rosemont, IL , USA ) |
| SQSTM1     | Rabbit         | bs-55207R  | 1:1500   | Bioss ANTIBODIES(China)                     |
| MMP9       | Rabbit         | ab283575   | 1:3000   | abcam ( Cambridge, UK )                     |
| MMP2       | Rabbit         | ab92536    | 1:3000   | abcam ( Cambridge, UK )                     |
| TIMP1      | Rabbit         | bs-0415R   | 1:1500   | Bioss ANTIBODIES(China)                     |
| ZO-1       | Rabbit         | 21773-1-AP | 1:1500   | PROTEINTECH GROUP<br>( Rosemont, IL , USA ) |
| Occludin   | Rabbit         | 27260-1-AP | 1:1500   | PROTEINTECH GROUP<br>( Rosemont, IL , USA ) |
| Claudin-5  | Rabbit         | AF5216     | 1:2000   | Affinity Biosciences(China)                 |
| GAPDH      | Rabbit         | ab9485     | 1:5000   | abcam ( Cambridge, UK )                     |

## Supplementary Material 4

### ZO-1、MMP9

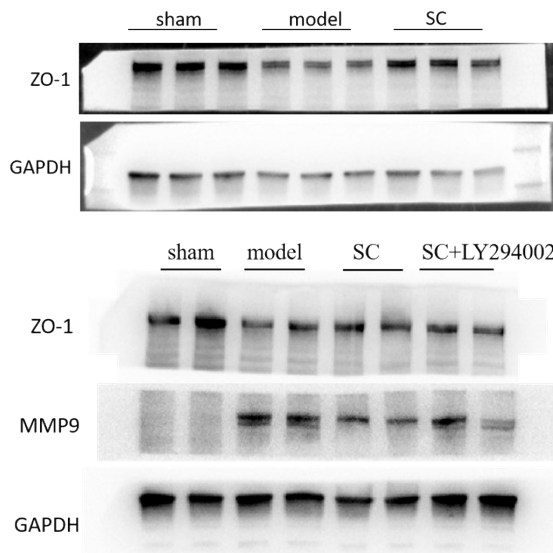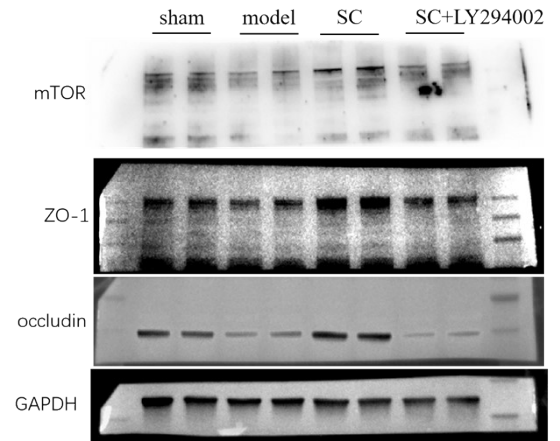

### Occludin、Claudin-5

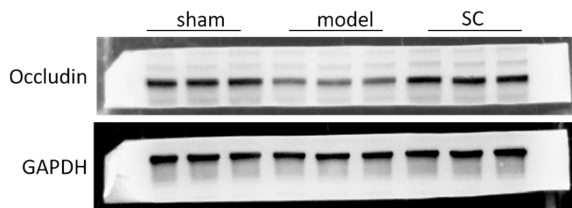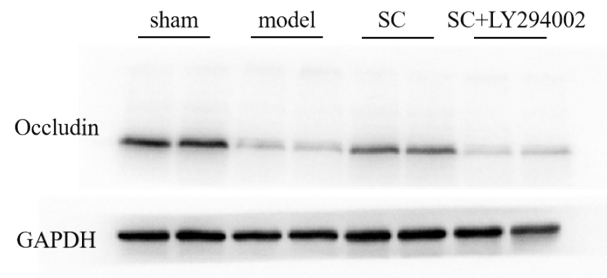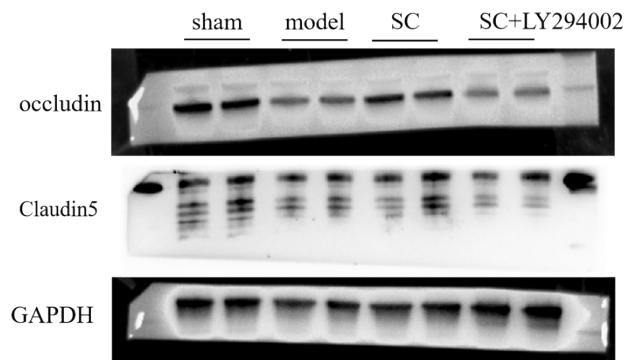

LC3B

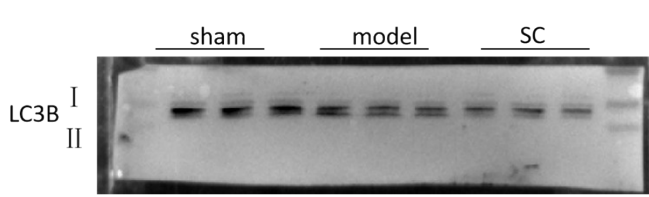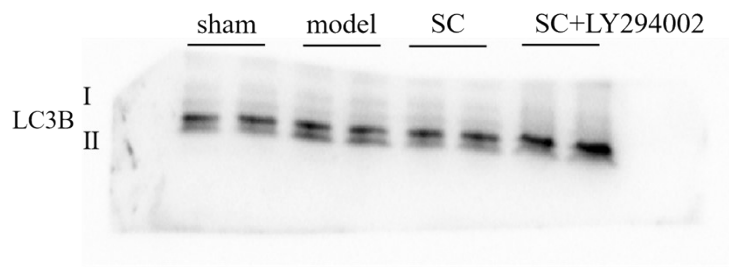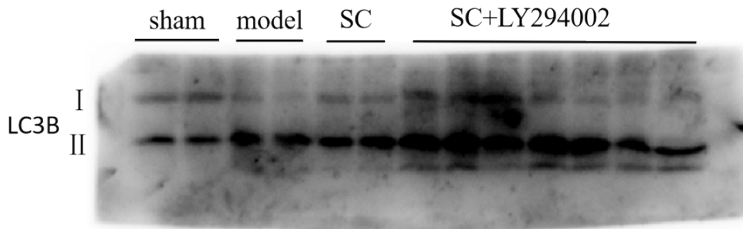

ATG5

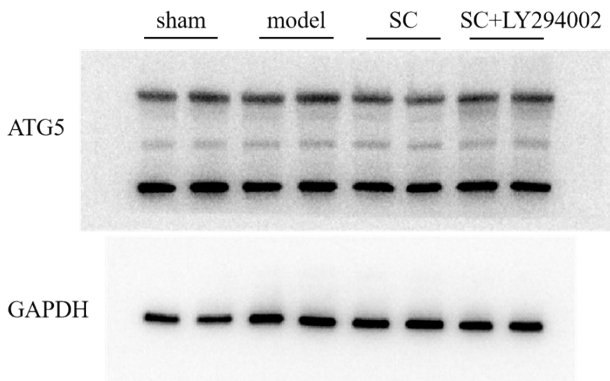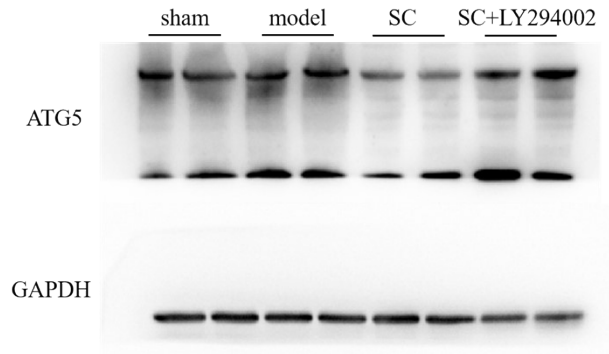

SQSTM1

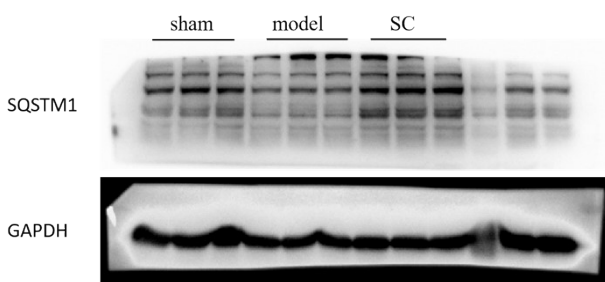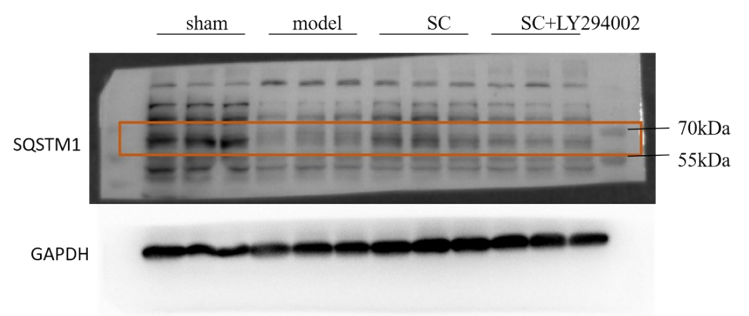

MMP2

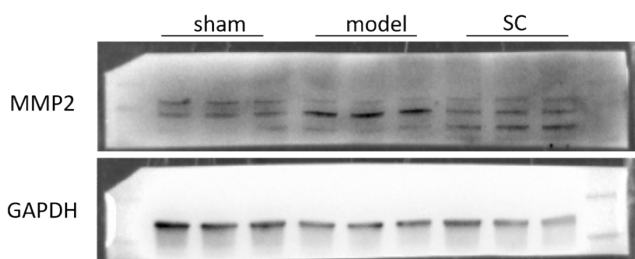

### MMP9

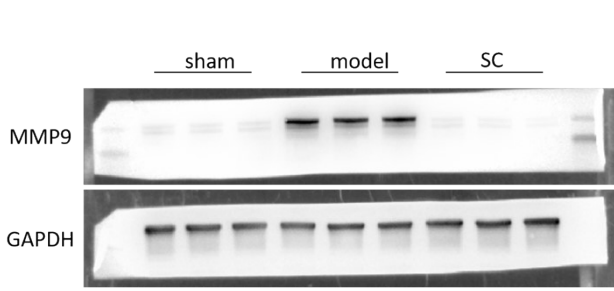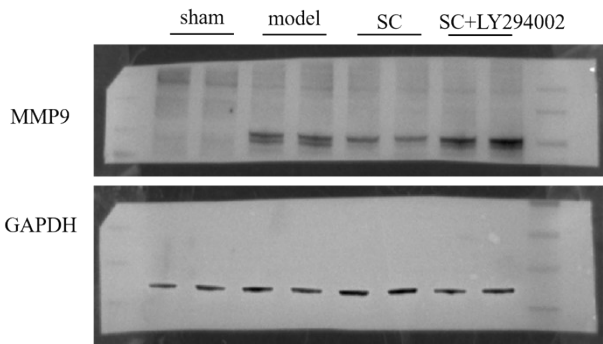

### TIMP1

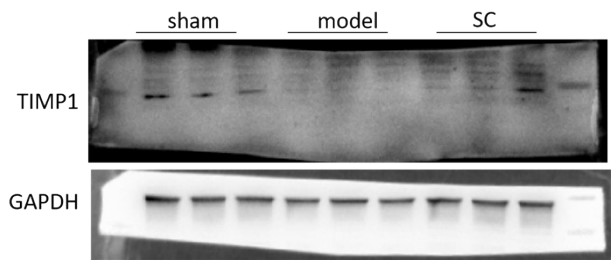

### PI3K-p85

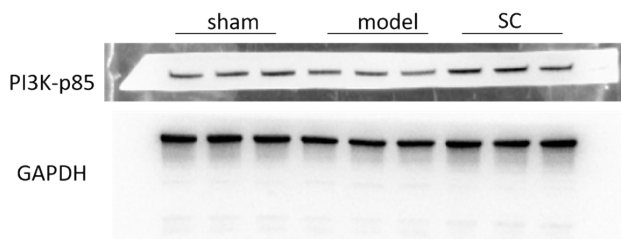

### AKT

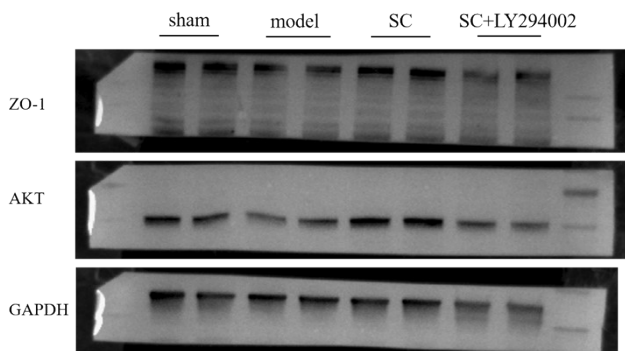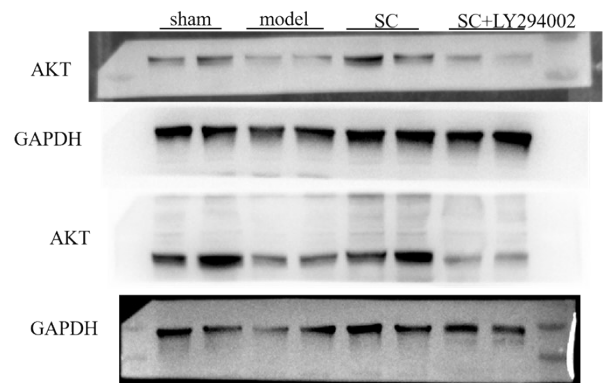

P-AKT

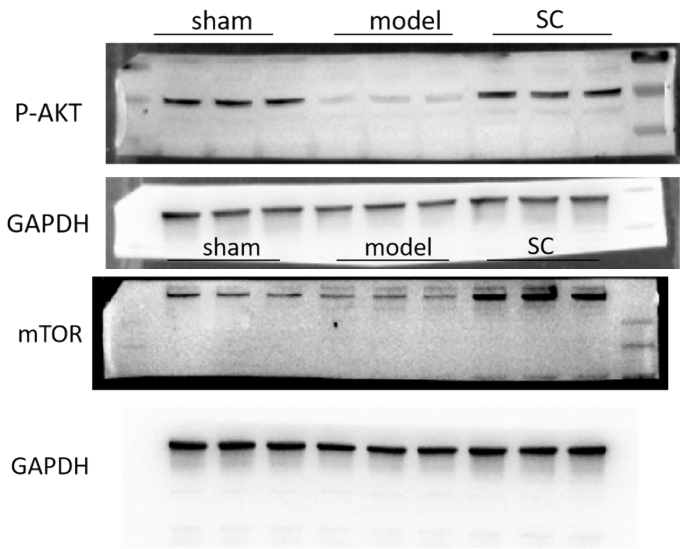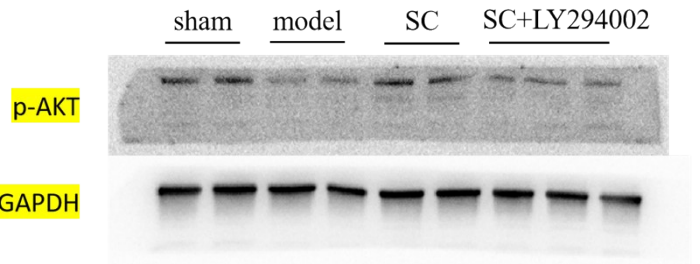

Supplement: d2fo02367a1.pdf [file d2fo02367a1.pdf]
